# Supplementary material
Source: HighWire-hosted journal article supplement (http://thorax.bmj.com/highwire/filestream/206993/field_highwire_adjunct_files/0/thorax-2023-220012supp001_data_supplement.pdf)
Supplement: thorax-2023-220012supp001_data_supplement.pdf [file thorax-2023-220012supp001_data_supplement.pdf]

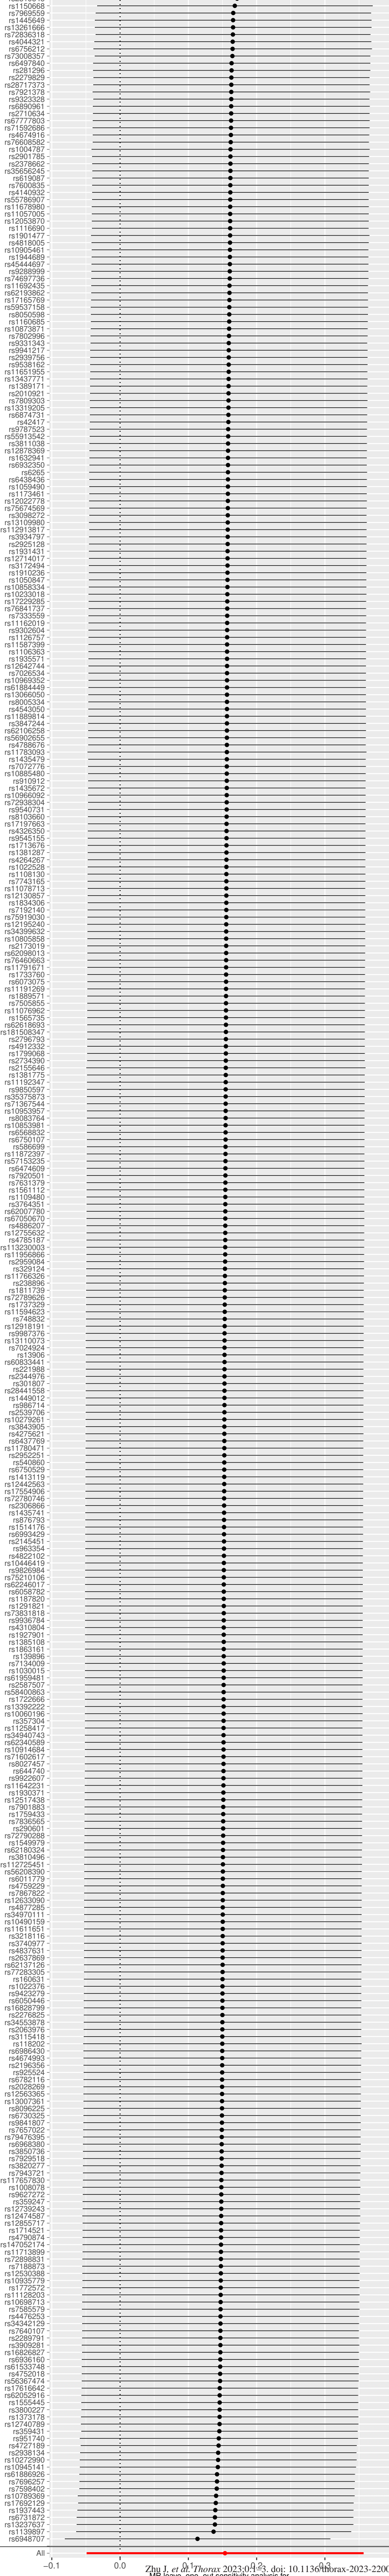

All  
-0.1 0.0 0.1 0.2 0.3  
Zhu J, et al. *Thorax* 2023;01:23. doi: 10.1136/thorax-2023-220012  
MR leave-one-out sensitivity analysis for  
'Smoking initiation' on 'IPF (International IPF Genetics Consortium)'
